# Supplementary material for: Reliability of Repeated Measures of Nutrient Intake by Diet Records in Residents in the Western Region of Japan
Source: PubMed Central journal article supplement (PMC6835429; doi:10.3390/nu11102515), 2019-10-18
Supplement: nutrients-11-02515-s001.pdf [file nutrients-11-02515-s001.pdf]

Table S1. Mean and SD of nutrient intakes in the current study and the Japan National Health and Nutrition Study 2016\*

| Nutrients                         | Current Study (n=131) |       | National Health and Nutrition Survey<br>Japan 2016 (n=26,133) |
|-----------------------------------|-----------------------|-------|---------------------------------------------------------------|
|                                   | Mean <sup>a</sup>     | SD    | Mean                                                          |
| Energy kcal                       | <b>1846</b>           | 354   | 1865                                                          |
| Protein g                         | <b>69.9</b>           | 15.0  | 68.5                                                          |
| Lipid g                           | <b>56.5</b>           | 15.9  | 57.2                                                          |
| SFA <sup>b</sup> g                | <b>15.65</b>          | 4.99  | 15.74                                                         |
| MUSFA <sup>c</sup> g              | <b>20.51</b>          | 6.52  | 19.70                                                         |
| PUFA <sup>d</sup> g               | <b>12.34</b>          | 3.31  | NA                                                            |
| n-3PUFA g                         | <b>2.35</b>           | 0.87  | 2.16                                                          |
| n-6PUFA g                         | <b>9.94</b>           | 2.71  | 9.16                                                          |
| Cholesterol mg                    | <b>322</b>            | 107   | 311                                                           |
| Carbohydrate g                    | <b>247</b>            | 49    | 253                                                           |
| Total fiber g                     | <b>15.4</b>           | 4.8   | 14.2                                                          |
| Soluble fiber g                   | <b>3.4</b>            | 1.2   | 3.3                                                           |
| Insoluble fiber g                 | <b>11.3</b>           | 3.5   | 10.3                                                          |
| Alcohol <sup>e</sup> g            | <b>7.5</b>            | 14.6  | 5.0*                                                          |
| Vitamin A µgRE <sup>f</sup>       | <b>561</b>            | 353   | 524                                                           |
| Vitamin D µg                      | <b>7.9</b>            | 4.2   | 7.5                                                           |
| alpha-Tocopherol mg               | <b>7.1</b>            | 1.9   | 6.4                                                           |
| Vitamin K µg                      | <b>232</b>            | 103   | 225                                                           |
| Vitamin B1 mg                     | <b>0.94</b>           | 0.21  | 0.86                                                          |
| Vitamin B2 mg                     | <b>1.39</b>           | 0.35  | 1.15                                                          |
| Niacin mgNE <sup>g</sup>          | <b>30.9</b>           | 7.2   | 14.4                                                          |
| Vitamin B6 mg                     | <b>1.34</b>           | 0.37  | 1.11                                                          |
| Vitamin B12 µg                    | <b>6.5</b>            | 3.3   | 6.0                                                           |
| Folate µg                         | <b>410</b>            | 128   | 277                                                           |
| Pantothenic acid mg               | <b>6.08</b>           | 1.39  | 5.45                                                          |
| Vitamin C mg                      | <b>143</b>            | 55    | 89                                                            |
| Sodium mg                         | <b>3624</b>           | 856   | 3770                                                          |
| Salt-Eq g                         | <b>9.1</b>            | 2.2   | 9.6                                                           |
| Potassium mg                      | <b>2794</b>           | 732   | 2219                                                          |
| Calcium mg                        | <b>538</b>            | 164   | 502                                                           |
| Magnesium mg                      | <b>278</b>            | 67    | 238                                                           |
| Phosphorus mg                     | <b>1035</b>           | 232   | 976                                                           |
| Iron mg                           | <b>8.7</b>            | 2.3   | 7.4                                                           |
| Selenium µg                       | <b>62</b>             | 18    | NA                                                            |
| Zinc mg                           | <b>7.9</b>            | 1.7   | 8.0                                                           |
| Copper mg                         | <b>1.21</b>           | 0.30  | 1.11                                                          |
| Manganese mg                      | <b>4.35</b>           | 1.29  | NA                                                            |
| beta-carotene µg                  | <b>3469</b>           | 1696  | NA                                                            |
| alpha-carotene µg                 | <b>563</b>            | 350   | NA                                                            |
| beta-cryptoxanthin µg             | <b>528.4</b>          | 442.7 | NA                                                            |
| % energy intake from carbohydrate | <b>53.5</b>           |       | 54.2                                                          |
| % energy intake from protein      | <b>15.2</b>           |       | 14.7                                                          |
| % energy intake from lipid        | <b>27.5</b>           |       | 27.6                                                          |

\*The data in this study was collected between 2014 and 2015 in Nagasaki Prefecture, Japan. The title of this study is “Reliability of repeated measures of nutrient intake by diet records in residents in the western region of Japan.”

<sup>a</sup>Means of 1571 diet records: an average of 12 records per participant

<sup>b</sup>Saturated fatty acid

<sup>c</sup>Monounsaturated fatty acid

<sup>d</sup>Polyunsaturated fatty acid

<sup>e</sup>The total alcohol intake in ethanol in gram was estimated from the total alcohol (ethanol) intake of beverages (beer, saki wine, and liquor and others) reported in the NHNS 2016.

<sup>f</sup>Retinol equivalent

<sup>g</sup>Niacin equivalent



<sup>a</sup>One participant completed 11 diet records.

<sup>b</sup>Saturated fatty acid

<sup>c</sup>Monounsaturated fatty acid

<sup>d</sup>Polyunsaturated fatty acid

<sup>e</sup>Retinol equivalent

<sup>f</sup>Niacin equivalent

Table S3. Sex-specific Intraclass Correlation Coefficients (ICC) and the ratio of within- to between person variance ( $\sigma_w^2/\sigma_b^2$ ) for intakes of energy-adjusted nutrients\*<sup>a</sup>

| Nutrients                             | Male (n=33)       |      |                   |                  | Female (n=98)     |      |                   |                  |
|---------------------------------------|-------------------|------|-------------------|------------------|-------------------|------|-------------------|------------------|
|                                       | Mean <sup>b</sup> | SD   | ICC (95%CI)       | R <sub>w/b</sub> | Mean <sup>c</sup> | SD   | ICC (95%CI)       | R <sub>w/b</sub> |
| Energy kcal                           | 2091              | 369  | 0.40 (0.28, 0.54) | 1.5              | 1764              | 310  | 0.46 (0.38, 0.54) | 1.2              |
| Protein g                             | 77.5              | 16.3 | 0.32 (0.20, 0.46) | 2.1              | 67.4              | 13.7 | 0.28 (0.22, 0.36) | 2.6              |
| Lipid g                               | 62.3              | 15.9 | 0.37 (0.25, 0.51) | 1.7              | 54.6              | 15.6 | 0.25 (0.19, 0.33) | 3.0              |
| SFA <sup>d</sup> g                    | 16.85             | 4.91 | 0.35 (0.23, 0.49) | 1.9              | 15.25             | 4.97 | 0.27 (0.21, 0.35) | 2.7              |
| MSFA <sup>e</sup> g                   | 23.03             | 6.78 | 0.32 (0.20, 0.45) | 2.1              | 19.67             | 6.24 | 0.25 (0.19, 0.32) | 3.0              |
| PUFA <sup>f</sup> g                   | 13.82             | 3.21 | 0.15 (0.08, 0.28) | 5.7              | 11.84             | 3.20 | 0.14 (0.09, 0.20) | 6.1              |
| n-6PUFA g                             | 2.78              | 0.93 | 0.15 (0.08, 0.27) | 5.7              | 2.21              | 0.80 | 0.13 (0.09, 0.19) | 6.7              |
| n-3PUFA g                             | 10.99             | 2.66 | 0.09 (0.04, 0.21) | 10.1             | 9.59              | 2.64 | 0.14 (0.10, 0.20) | 6.1              |
| Cholesterol mg                        | 375               | 127  | 0.22 (0.13, 0.35) | 3.5              | 305               | 93   | 0.10 (0.06, 0.16) | 9.0              |
| Carbohydrates g                       | 261               | 65   | 0.47 (0.34, 0.61) | 1.1              | 242               | 42   | 0.29 (0.22, 0.37) | 2.4              |
| Total fiber g                         | 14.2              | 5.7  | 0.54 (0.40, 0.67) | 0.9              | 15.8              | 4.4  | 0.42 (0.34, 0.50) | 1.4              |
| Soluble fiber g                       | 3.0               | 1.3  | 0.48 (0.35, 0.61) | 1.1              | 3.5               | 1.1  | 0.25 (0.19, 0.32) | 3.0              |
| Insoluble fiber g                     | 10.5              | 4.4  | 0.54 (0.41, 0.67) | 0.9              | 11.5              | 3.2  | 0.40 (0.33, 0.48) | 1.5              |
| vitamin A $\mu\text{gRE}^g$           | 547               | 409  | 0.07 (0.03, 0.18) | 13.3             | 566               | 335  | 0.01 (0.00, 0.12) | 99.0             |
| Vitamin D $\mu\text{g}$               | 9.6               | 5.3  | 0.11 (0.05, 0.22) | 8.1              | 7.3               | 3.6  | 0.03 (0.01, 0.08) | 32.3             |
| alpha-Tocopherol mg                   | 7.1               | 2.0  | 0.25 (0.15, 0.38) | 3.0              | 7.1               | 1.8  | 0.21 (0.15, 0.28) | 3.8              |
| Vitamin K $\mu\text{g}$               | 230               | 106  | 0.29 (0.18, 0.43) | 2.4              | 232               | 103  | 0.33 (0.26, 0.41) | 2.0              |
| Vitamin B <sub>1</sub> mg             | 0.98              | 0.22 | 0.11 (0.05, 0.22) | 8.1              | 0.92              | 0.2  | 0.12 (0.08, 0.18) | 7.3              |
| Vitamin B <sub>2</sub> mg             | 1.42              | 0.36 | 0.24 (0.14, 0.38) | 3.2              | 1.37              | 0.35 | 0.32 (0.25, 0.40) | 2.1              |
| Niacin mgNE <sup>h</sup>              | 35.8              | 8.2  | 0.29 (0.18, 0.43) | 2.4              | 29.3              | 6.1  | 0.19 (0.14, 0.26) | 4.3              |
| Vitamin B <sub>6</sub> mg             | 1.44              | 0.44 | 0.46 (0.33, 0.60) | 1.2              | 1.31              | 0.34 | 0.37 (0.30, 0.45) | 1.7              |
| Vitamin B <sub>12</sub> $\mu\text{g}$ | 7.4               | 4.2  | 0.16 (0.08, 0.28) | 5.3              | 6.2               | 2.9  | 0.05 (0.02, 0.10) | 19.0             |
| Folate $\mu\text{g}$                  | 399               | 154  | 0.41 (0.28, 0.55) | 1.4              | 413               | 118  | 0.30 (0.24, 0.38) | 2.3              |
| Pantothenic acid mg                   | 6.34              | 1.59 | 0.37 (0.25, 0.52) | 1.7              | 5.99              | 1.32 | 0.29 (0.22, 0.36) | 2.4              |
| Vitamin C mg                          | 126               | 58   | 0.40 (0.27, 0.54) | 1.5              | 149               | 53   | 0.35 (0.28, 0.43) | 1.9              |
| Sodium mg                             | 3880              | 940  | 0.23 (0.14, 0.36) | 3.3              | 3538              | 812  | 0.22 (0.16, 0.29) | 3.5              |
| Salt-Eq g                             | 9.8               | 2.4  | 0.22 (0.13, 0.35) | 3.5              | 8.9               | 2.1  | 0.22 (0.16, 0.29) | 3.5              |
| Potassium mg                          | 2770              | 811  | 0.51 (0.38, 0.64) | 1.0              | 2803              | 707  | 0.48 (0.41, 0.56) | 1.1              |
| Calcium mg                            | 487               | 170  | 0.36 (0.24, 0.50) | 1.8              | 555               | 159  | 0.28 (0.21, 0.36) | 2.6              |
| Magnesium mg                          | 286               | 69   | 0.20 (0.11, 0.33) | 4.0              | 275               | 66   | 0.29 (0.22, 0.37) | 2.4              |
| Phosphorus mg                         | 1100              | 252  | 0.40 (0.27, 0.54) | 1.5              | 1013              | 222  | 0.35 (0.27, 0.43) | 1.9              |
| Iron mg                               | 8.8               | 2.7  | 0.44 (0.31, 0.58) | 1.3              | 8.7               | 2.2  | 0.31 (0.24, 0.39) | 2.2              |
| Selenium $\mu\text{g}$                | 69                | 19   | 0.06 (0.02, 0.17) | 15.7             | 59                | 17   | 0.07 (0.04, 0.13) | 13.3             |
| Zinc mg                               | 8.7               | 1.9  | 0.20 (0.11, 0.33) | 4.0              | 7.7               | 1.5  | 0.16 (0.11, 0.23) | 5.3              |
| Copper mg                             | 1.27              | 0.37 | 0.19 (0.11, 0.32) | 4.3              | 1.19              | 0.27 | 0.33 (0.26, 0.41) | 2.0              |
| Manganese mg                          | 4.32              | 1.48 | 0.42 (0.30, 0.56) | 1.4              | 4.36              | 1.22 | 0.45 (0.37, 0.53) | 1.2              |
| beta-Carotene $\mu\text{g}$           | 3362              | 1995 | 0.23 (0.14, 0.37) | 3.3              | 3504              | 1594 | 0.24 (0.18, 0.32) | 3.2              |
| alpha-Carotene $\mu\text{g}$          | 593               | 461  | 0.06 (0.02, 0.17) | 15.7             | 554               | 305  | 0.02 (0.00, 0.09) | 49.0             |
| beta-Cryptoxanthin $\mu\text{g}$      | 319               | 366  | 0.15 (0.08, 0.27) | 5.7              | 599               | 446  | 0.03 (0.01, 0.08) | 32.3             |

---

\*The data in this study was collected between 2014 and 2015 in Nagasaki Prefecture, Japan. The title of this study is “Reliability of repeated measures of nutrient intake by diet records in residents in the western region of Japan.”

<sup>a</sup>Adjustment by use of the residual model method

<sup>b</sup>Mean of 395 diet records obtained from 33 male participants

<sup>c</sup>Means of 1176 diet records obtained from 98 female participants

<sup>d</sup>Saturated fatty acid

<sup>e</sup>Monounsaturated fatty acid

<sup>f</sup>Polyunsaturated fatty acid

<sup>g</sup>Retinol equivalent

<sup>h</sup>Niacin equivalent

Table S4. Coefficients of within-person variation and the number of days needed to lie within specified 10% of the true mean of energy-adjusted nutrients\*<sup>a</sup>

| Nutrients                   | Male (n=33)                           |                 | Female (n=98)                         |                 |
|-----------------------------|---------------------------------------|-----------------|---------------------------------------|-----------------|
|                             | CV <sub>w</sub> (95% CI) <sup>b</sup> | Specified limit | CV <sub>w</sub> (95% CI) <sup>c</sup> | Specified limit |
|                             |                                       | as %            |                                       | as %            |
|                             |                                       | 10%             |                                       | 10%             |
| Protein g                   | 0.18 (0.17, 0.20)                     | 13              | 0.17 (0.16, 0.18)                     | 12              |
| Lipid g                     | 0.24 (0.22, 0.27)                     | 23              | 0.23 (0.22, 0.24)                     | 21              |
| SFA <sup>d</sup> g          | 0.33 (0.29, 0.37)                     | 42              | 0.31 (0.29, 0.33)                     | 37              |
| MSFA <sup>e</sup> g         | 0.32 (0.29, 0.36)                     | 40              | 0.30 (0.29, 0.32)                     | 35              |
| PUFA <sup>f</sup> g         | 0.28 (0.26, 0.31)                     | 31              | 0.32 (0.30, 0.34)                     | 40              |
| n-6PUFA g                   | 0.33 (0.30, 0.36)                     | 42              | 0.34 (0.33, 0.36)                     | 45              |
| n-3PUFA g                   | 0.57 (0.51, 0.63)                     | 125             | 0.55 (0.51, 0.58)                     | 117             |
| Cholesterol mg              | 0.45 (0.40, 0.51)                     | 78              | 0.49 (0.46, 0.52)                     | 93              |
| Carbohydrates g             | 0.15 (0.14, 0.16)                     | 9               | 0.12 (0.12, 0.13)                     | 6               |
| Total fiber g               | 0.30 (0.26, 0.35)                     | 35              | 0.26 (0.25, 0.28)                     | 26              |
| Soluble fiber g             | 0.36 (0.32, 0.42)                     | 50              | 0.41 (0.38, 0.44)                     | 65              |
| Insoluble fiber g           | 0.31 (0.27, 0.36)                     | 37              | 0.27 (0.25, 0.29)                     | 29              |
| vitamin A µgRE <sup>g</sup> | 1.32 (1.09, 1.61)                     | 670             | 1.67 (1.49, 1.86)                     | 1072            |
| Vitamin D µg                | 1.11 (0.92, 1.34)                     | 474             | 1.41 (1.27, 1.56)                     | 764             |
| alpha-Tocopherol mg         | 0.33 (0.30, 0.36)                     | 42              | 0.32 (0.31, 0.34)                     | 40              |
| Vitamin K µg                | 0.62 (0.52, 0.73)                     | 148             | 0.56 (0.51, 0.62)                     | 121             |
| Vitamin B <sub>1</sub> mg   | 0.38 (0.34, 0.41)                     | 56              | 0.31 (0.30, 0.33)                     | 37              |
| Vitamin B <sub>2</sub> mg   | 0.26 (0.24, 0.29)                     | 26              | 0.25 (0.23, 0.26)                     | 25              |
| Niacin mgNE <sup>h</sup>    | 0.23 (0.21, 0.25)                     | 21              | 0.23 (0.21, 0.24)                     | 21              |
| Vitamin B <sub>6</sub> mg   | 0.24 (0.22, 0.27)                     | 23              | 0.24 (0.23, 0.26)                     | 23              |
| Vitamin B <sub>12</sub> µg  | 0.89 (0.75, 1.06)                     | 305             | 1.33 (1.20, 1.48)                     | 680             |
| Folate µg                   | 0.35 (0.31, 0.39)                     | 48              | 0.34 (0.32, 0.36)                     | 45              |
| Pantothenic acid mg         | 0.20 (0.19, 0.22)                     | 16              | 0.21 (0.20, 0.22)                     | 17              |
| Vitamin C mg                | 0.46 (0.39, 0.54)                     | 82              | 0.39 (0.37, 0.43)                     | 59              |
| Sodium mg                   | 0.31 (0.28, 0.34)                     | 37              | 0.28 (0.27, 0.30)                     | 31              |
| Salt-Eq g                   | 0.32 (0.29, 0.35)                     | 40              | 0.29 (0.27, 0.30)                     | 33              |
| Potassium mg                | 0.21 (0.19, 0.23)                     | 17              | 0.19 (0.18, 0.21)                     | 14              |
| Calcium mg                  | 0.36 (0.32, 0.41)                     | 50              | 0.32 (0.31, 0.35)                     | 40              |
| Magnesium mg                | 0.30 (0.27, 0.33)                     | 35              | 0.25 (0.24, 0.27)                     | 25              |
| Phosphorus mg               | 0.18 (0.16, 0.20)                     | 13              | 0.17 (0.16, 0.18)                     | 12              |
| Iron mg                     | 0.23 (0.21, 0.26)                     | 21              | 0.26 (0.25, 0.28)                     | 26              |
| Selenium µg                 | 0.50 (0.45, 0.55)                     | 97              | 0.50 (0.47, 0.53)                     | 97              |
| Zinc mg                     | 0.22 (0.20, 0.24)                     | 19              | 0.23 (0.22, 0.24)                     | 21              |
| Copper mg                   | 0.37 (0.34, 0.42)                     | 53              | 0.21 (0.20, 0.22)                     | 17              |
| Manganese mg                | 0.28 (0.25, 0.31)                     | 31              | 0.26 (0.24, 0.28)                     | 26              |
| beta-carotene µg            | 0.85 (0.70, 1.03)                     | 278             | 0.68 (0.61, 0.74)                     | 178             |

|                          |                   |      |                   |      |
|--------------------------|-------------------|------|-------------------|------|
| alpha-carotene µg        | 1.99 (1.51, 2.61) | 1522 | 2.57 (2.18, 3.03) | 2538 |
| beta-cryptoxanthin<br>µg | 2.10 (1.45, 3.06) | 1695 | 2.37 (2.00, 2.79) | 2158 |

---

\*The data in this study was collected between 2014 and 2015 in Nagasaki Prefecture, Japan. The title of this study is “Reliability of repeated measures of nutrient intake by diet records in residents in the western region of Japan.”

<sup>a</sup>Adjustment by use of the residual model method

<sup>b</sup>Analysis was done using 395 diet records obtained from 33 male participants.

<sup>c</sup>Analysis was done using 1176 diet records obtained from 98 female participants.

<sup>d</sup>Saturated fatty acid

<sup>e</sup>Monounsaturated fatty acid

<sup>f</sup>Polyunsaturated fatty acid

<sup>g</sup>Retinol equivalent

<sup>h</sup>Niacin equivalent
